# Supplementary material
Source: PubMed Central journal article supplement (PMC1567880)
Supplement: pnas_0603137103_2.pdf [file pnas_0603137103_2.pdf]

|         |                      |                        |                       |                        |                        |                        |
|---------|----------------------|------------------------|-----------------------|------------------------|------------------------|------------------------|
| PPO1    | MSAMALSSSI           | LQCPPHSDIS             | FRFFAHTRTQ            | PPIFFGRPRK             | LSYIHCSTSS             | SSTANYQNTI             |
| PPO2L   | ----MVIQSI           | THLSPNLALP             | SPLSVSTKNY            | PVAVMG----             | -----                  | -----NI                |
| PPO2    | -----                | -----                  | -----                 | ----MG----             | -----                  | -----NI                |
| Consen. | -----:--:            | -----:--:              | -----:--:             | -----:--:              | -----:--:              | -----:--:              |
|         |                      |                        |                       |                        |                        |                        |
| PPO1    | TSQEGGDKVL           | DCVIVGAGIS             | GLCIAQALST            | KHIQSNLNF1             | VTEAKHRVGG             | NITTMESDGY             |
| PPO2L   | SEREPTSAK            | RVAVVGAGVS             | GLAAAYKLKS            | ----HGLSVT             | LFEADSRAGG             | KLKTVKKDGF             |
| PPO2    | SERDEPTSAK           | RVAVVGAGVS             | GLAAAYKLKS            | ----HGLNVT             | LFEADSRAGG             | KLKTVKKDGF             |
| Consen. | :---*-----           | ---:****:*             | **--*--*--:           | -----*---              | :---*--*--*            | -:--:--*--:            |
|         |                      |                        |                       |                        |                        |                        |
| PPO1    | IWEEGPNFQ            | PSDPVLTMAV             | DSG-LKDDL             | LGDNPAPRFV             | LWNGKLRPVP             | SKPTDLPFFD             |
| PPO2L   | IWDEGANTMT           | ESEAEVSSLI             | DDLGLREKQQ            | LPISQNKRYI             | ARDGLPVLLP             | SNPAALLTSN             |
| PPO2    | IWDEGANTMT           | ESEAEVSSLI             | DDLGLREKQQ            | LPISQNKRYI             | ARDGLPVLLP             | SNPAALLTSN             |
| Consen. | **:*--*--:-          | -*--:--:--:-           | *--*--:--:-           | *--*--:--:--:          | ---*-----:*            | *--*--*-----           |
|         |                      |                        |                       |                        |                        |                        |
| PPO1    | LMSFPGKIRA           | GLGALGLRPP             | -----PPSY             | EESVEEFVRR             | NLGDEVFERL             | IEPFCSGVYA             |
| PPO2L   | ILSAKSKLQI           | MLEPFLWRKH             | NATELSDEHV            | QESVGEFFER             | HFGKEFVDYV             | IDPFVAGTCG             |
| PPO2    | ILSAKSKLQI           | MLEPFFWRKH             | NATELSDEHV            | QESVGEFFER             | HFGKEFVDYV             | IDPFVAGTCG             |
| Consen. | ::*--*--:--          | -*-----*--             | -----                 | -----*--*--*           | ---*--*--:-:           | *:---*--*--:-:         |
|         |                      |                        |                       |                        |                        |                        |
| PPO1    | GDDPAKLSMKA          | AFGKVWVLEQ             | KGGSIIAGTL            | KTIQERKNNP             | PPRPDRPLPK             | PKGQTVGSFR             |
| PPO2L   | GDPQSLSMHH           | TFPEVWNIEK             | RFGSVFAGLI            | QSTLLSKKEK             | GGE-NASIKK             | PRVRGSFSFQ             |
| PPO2    | GDPQSLSMHH           | TFPEVWNIEK             | RFGSVFAGLI            | QSTLLSKKEK             | GGGGNASIKK             | PRVRGSFSFH             |
| Consen. | **--*--*--:-         | -*--*--*--:*           | :--*--*--*--:         | -:--*--*--*--:-        | -----:-*               | *:--*--*--*--:-        |
|         |                      |                        |                       |                        |                        |                        |
| PPO1    | KGLIMLPTAI           | AARLG-SKVK             | LSWTLSNIDK            | SLN-----GE             | YNLTYQTPDG             | PVSVRTRKAVV            |
| PPO2L   | GGMQTLVDTM           | CKQLGEDELK             | LQCEVLSLSY            | NQKGIPSLGN             | WSVSSMSNNT             | SEDQSYDAVV             |
| PPO2    | GGMQTLVDTI           | CKQLGEDELK             | LQCEVLSLSY            | NQKGIPSLGN             | WSVSSMSNNT             | SEDQSYDAVV             |
| Consen. | -*--*--*--:*         | -----*--*--*--:        | *--*--*--*--:-        | -----*--*--*--:-       | :--:--:--:--:-         | -----*--*--*--:-       |
|         |                      |                        |                       |                        |                        |                        |
| PPO1    | MTVPS--YIA           | SSLRPLSDV              | AADSLSKFY             | PPVAAVLSYS             | PKEAIRPECL             | IDGELKGFQ              |
| PPO2L   | VTAPIRNVKE           | MKIMKFGNPF             | SLDFIPEVTV            | VPLSVMITAF             | KKDKVK----             | --RPLEGFGV             |
| PPO2    | VTAPIRNVKE           | MKIMKFGNPF             | SLDFIPEVTV            | VPLSVMITAF             | KKDKVK----             | --RPLEGFGV             |
| Consen. | *--*--*--*--:-       | --:--:--*--*--:-       | --*--*--*--*--:-      | *--*--*--*--*--:-      | *--*--*--*--*--:-      | -----*--*--*--*--:-    |
|         |                      |                        |                       |                        |                        |                        |
| PPO1    | LHP---RSQG           | VETLGTIYSS             | SLFPGRAPP             | RTLILSYIGG             | ATNLGILQKS             | EDELAETVDK             |
| PPO2L   | LIPSKEQHNG           | LKTLGTLFSS             | MMFPDRAPSD            | MCLFTTFVGG             | SRNRKLANAS             | TDELKQIVSS             |
| PPO2    | LIPSKEQHNG           | LKTLGTLFSS             | MMFPDRAPSD            | MCLFTTFVGG             | SRNRKLANAS             | TDELKQIVSS             |
| Consen. | *--*--*--*--*--:*    | :--*--*--*--*--*--:    | -:--*--*--*--*--*--:- | -----*--*--*--*--*--:- | -----*--*--*--*--*--:- | -----*--*--*--*--*--:- |
|         |                      |                        |                       |                        |                        |                        |
| PPO1    | DLRKILINPN           | AKGSRVLGVR             | VWPKAIPQFL            | VGHFDVLDAA             | KAGLANAGQK             | GLFLGGNYVS             |
| PPO2L   | DLQQLLGTED           | E--PSFVNHL             | FWSNAFPLYG            | HNYDSVLRAI             | DK--MEKDLF             | GFFYAGNHKG             |
| PPO2    | DLQQLLGTED           | E--PSFVNHL             | FWSNAFPLYG            | HNYDSVLRAI             | DK--MEKDLF             | GFFYAGNHKG             |
| Consen. | **--:--*--*--*--:-   | -----:--*--*--*--*--:- | -*--*--*--*--*--:-    | -----*--*--*--*--*--:- | -----*--*--*--*--*--:- | *--*--*--*--*--*--:-   |
|         |                      |                        |                       |                        |                        |                        |
| PPO1    | GVALGRGIEG           | AYDSASEVVD             | FLSQYKDK--            | -----                  | -----                  | -----                  |
| PPO2L   | GLSVGKAMAS           | GCKAAELVIS             | YLDShIYVKM            | DEKTA                  | -----                  | -----                  |
| PPO2    | GLSVGKAMAS           | GCKAAELVIS             | YLDShIYVKM            | DEKTA                  | -----                  | -----                  |
| Consen. | *--:--*--*--*--*--:- | :--*--*--*--*--*--:-   | :--*--*--*--*--*--:-  | -----*--*--*--*--*--:- | -----*--*--*--*--*--:- | -----*--*--*--*--*--:- |
