# Supplementary material
Source: PubMed Central journal article supplement (PMC1567880)
Supplement: pnas_0603137103_3.pdf [file pnas_0603137103_3.pdf]

1

|         |            |            |            |            |            |           |
|---------|------------|------------|------------|------------|------------|-----------|
| S-WT    | MVIQSITHLS | PNLALPSPLS | VSTKNYPVAV | MGNISEREEP | TSAKRVAVVG | AGVSGLAAY |
| S-BioAC | MVIQSITHLS | PNLALPSPLS | VSTKNYPVAV | MGNISEREEP | TSAKRVAVVG | AGVSGLAAY |
| R-BioAC | MVIQSITHLS | PNLALPSPLS | VSTKNYPVAV | MGNISEREEP | TSAKRVAVVG | AGVSGLAAY |
| R-BioCC | MVIQSITHLS | PNLALPSPLS | VSTKNYPVAV | MGNISEREEP | TSAKRVAVVG | AGVSGLAAY |

61

\*

|         |            |            |            |            |            |            |
|---------|------------|------------|------------|------------|------------|------------|
| S-WT    | KLKSHGLSVT | LFEADSRAGG | KLKTVKKDGF | IWDEGANTMT | ESEAEVSSLI | DDLGLREKQQ |
| S-BioAC | KLKSHGLSVT | LFEADSRAGG | KLKTVKKDGF | IWDEGANTMT | ESEAEVSSLI | DDLGLREKQQ |
| R-BioAC | KLKSHGLSVT | LFEADSRAGG | KLKTVKKDGF | IWDEGANTMT | ESEAEVSSLI | DDLGLREKQQ |
| R-BioCC | KLKSHGLSVT | LFEANSRAGG | KLKTVKKDGF | IWDEGANTMT | ESEAEVSSLI | DDLGLREKQQ |

121

\*

|         |            |            |            |            |            |            |
|---------|------------|------------|------------|------------|------------|------------|
| S-WT    | LPISQNKRYI | ARDGLPVLPP | SNPAALLTSN | ILSAKSKLQI | MLEPFLWRKH | NATELSDEHV |
| S-BioAC | LPISQNKRYI | ARAGLPVLPP | SNPAALLTSN | ILSAKSKLQI | MLEPFLWRKH | NATELSDEHV |
| R-BioAC | LPISQNKRYI | ARDGLPVLPP | SNPAALLTSN | ILSAKSKLQI | MLEPFLWRKH | NATELSDEHV |
| R-BioCC | LPISQNKRYI | ARDGLPVLPP | SNPAALLTSN | ILSAKSKLQI | MLEPFLWRKH | NATELSDEHV |

181

\*

\*

|         |            |            |           |          |            |           |            |
|---------|------------|------------|-----------|----------|------------|-----------|------------|
| S-WT    | QESVGEFFER | HFGKEFVDYV | IDPFVAGTC | <b>G</b> | GDPQSLSMHH | TFPEVWNIK | RFGSVFAGLI |
| S-BioAC | QESVGEFFER | HFGKEFVDYV | IDPFVAGTC | <b>G</b> | GDPQSLSMHH | TFPEVWNIK | RFGSVFAGLI |
| R-BioAC | QESVGEFFER | HFGKEFVDYV | IDPFVAGTC | <b>-</b> | GDPQSLSMHH | TFPEVWNIK | RFGSVFAGLI |
| R-BioCC | QESVGEFFER | HFGKEFVDYV | IDPFVAGTC | <b>-</b> | GDPQSLSMYH | TFPEVWNIK | RFGSVFAGLI |

241

|         |            |           |            |            |            |            |
|---------|------------|-----------|------------|------------|------------|------------|
| S-WT    | QSTLLSKKEK | GENASIKKP | RVRGSFSFQG | GMQTLVDTMC | KQLGEDELKL | QCEVLSLSYN |
| S-BioAC | QSTLLSKKEK | GENASIKKP | RVRGSFSFQG | GMQTLVDTMC | KQLGEDELKL | QCEVLSLSYN |
| R-BioAC | QSTLLSKKEK | GENASIKKP | RVRGSFSFQG | GMQTLVDTMC | KQLGEDELKL | QCEVLSLSYN |
| R-BioCC | QSTLLSKKEK | GENASIKKP | RVRGSFSFQG | GMQTLVDTMC | KQLGEDELKL | QCEVLSLSYN |

301

|         |            |            |            |            |           |            |
|---------|------------|------------|------------|------------|-----------|------------|
| S-WT    | QKGIPSLGNW | SVSSMSNNTS | EDQSYDAVVV | TAPIRNVKEM | KIMKFGNPF | LDFIPEVTYV |
| S-BioAC | QKGIPSLGNW | SVSSMSNNTS | EDQSYDAVVV | TAPIRNVKEM | KIMKFGNPF | LDFIPEVTYV |
| R-BioAC | QKGIPSLGNW | SVSSMSNNTS | EDQSYDAVVV | TAPIRNVKEM | KIMKFGNPF | LDFIPEVTYV |
| R-BioCC | QKGIPSLGNW | SVSSMSNNTS | EDQSYDAVVV | TAPIRNVKEM | KIMKFGNPF | LDFIPEVTYV |

361

|         |            |            |            |            |            |            |
|---------|------------|------------|------------|------------|------------|------------|
| S-WT    | PLSVMITAFK | KDKVKRPLEG | FGVLIPSKEQ | HNGLKTLGTL | FSSMMFPDRA | PSDMCLFTTF |
| S-BioAC | PLSVMITAFK | KDKVKRPLEG | FGVLIPSKEQ | HNGLKTLGTL | FSSMMFPDRA | PSDMCLFTTF |
| R-BioAC | PLSVMITAFK | KDKVKRPLEG | FGVLIPSKEQ | HNGLKTLGTL | FSSMMFPDRA | PSDMCLFTTF |
| R-BioCC | PLSVMITAFK | KDKVKRPLEG | FGVLIPSKEQ | HNGLKTLGTL | FSSMMFPDRA | PSDMCLFTTF |

421

\*

|         |            |            |            |            |            |            |
|---------|------------|------------|------------|------------|------------|------------|
| S-WT    | VGGSRRNKLA | NASTDELKQI | VSSDLQQLLG | TEDEPSFVNH | LFWSNAFFLY | GHNYDSVLRA |
| S-BioAC | VGGSRRNKLA | NASTDELKQI | VSSDLQQLLG | TEDEPSFVNH | LFWSNAFFLY | GHNYDSVLRA |
| R-BioAC | VGGSRRNKLA | NASTDELKQI | VSSDLQQLLG | TEDEPSFVNH | LFWSNAFFLY | GHNYDCVLR  |
| R-BioCC | VGGSRRNKLA | NASTDELKQI | VSSDLQQLLG | TEDEPSFVNH | LFWSNAFFLY | GHNYDSVLRA |

481

|         |            |            |            |            |            |      |
|---------|------------|------------|------------|------------|------------|------|
| S-WT    | IDKMEKDLPG | FFYAGNHKGG | LSVGKAMASG | CKAAELVISY | LDSHIYVKMD | EKTA |
| S-BioAC | IDKMEKDLPG | FFYAGNHKGG | LSVGKAMASG | CKAAELVISY | LDSHIYVKMD | EKTA |
| R-BioAC | IDKMEKDLPG | FFYAGNHKGG | LSVGKAMASG | CKAAELVISY | LDSHIYVKMD | EKTA |
| R-BioCC | IDKMEKDLPG | FFYAGNHKGG | LSVGKAMASG | CKAAELVISY | LDSHIYVKMD | EKTA |
