# Supplementary material
Source: PubMed Central journal article supplement (PMC1567880)

G

S - TTTGTTGATTATGTTATTGACCCTTTTGTTCGCGGGTACATGTGGTGGAGATCCTCAATCGCTTTC

R - TTTGTTGATTATGTTATTGACCCTTTTGTTCGCGGGTACATGT---GGAGATCCTCAATCGCCTTTC

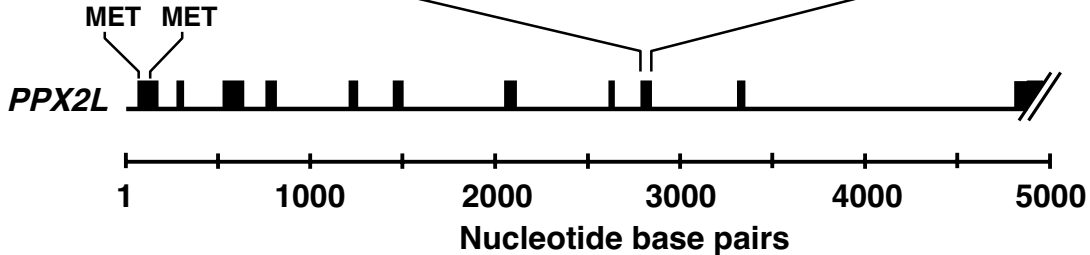

Supplement: pnas_0603137103_4.pdf [file pnas_0603137103_4.pdf]
