# Supplementary material
Source: PubMed Central journal article supplement (PMC1567880)

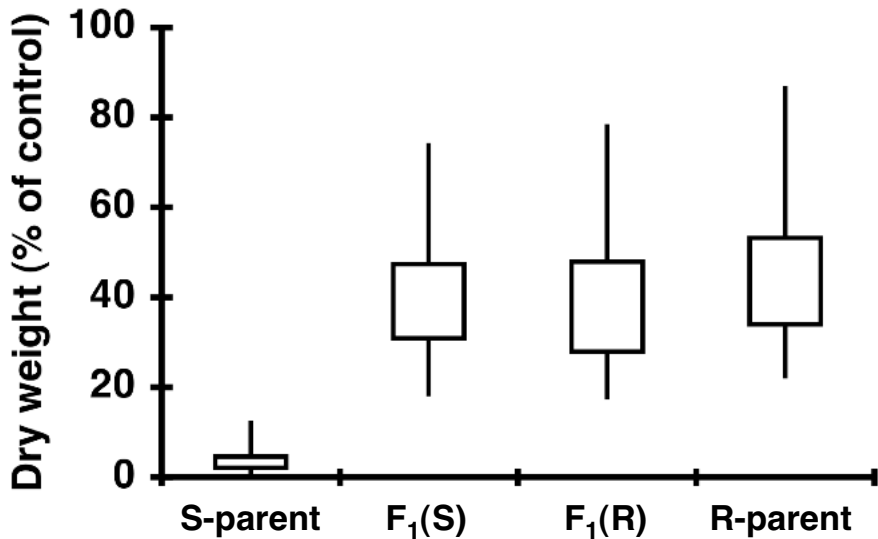

Supplement: pnas_0603137103_1.pdf [file pnas_0603137103_1.pdf]
